# Supplementary material for: Evaluation of ligand effects in the modified cobalt hydroformylation of 1-octene. Crystal structures of [Co(L)(CO)3]2 (L = PA–C5, PCy3 and PCyp3)
Source: Royal Society of Chemistry journal article supplement (doi:10.1039/c1dt10581g), 2011-01-01
Supplement: c1dt10581g.pdf [file c1dt10581g.pdf]

## Electronic Supplementary Information to:

### Evaluation of ligand effects in the modified cobalt hydroformylation of 1-octene. Crystal structures of $[\text{Co}(\text{L})(\text{CO})_3]_2$ (L= PA-C<sub>5</sub>, PCy<sub>3</sub> and PCyp<sub>3</sub>)

Peter N. Bungu<sup>a</sup> and Stefanus Otto<sup>ab\*</sup>

<sup>a</sup> Sasol Technology Research & Development, 1 Klasie Havenga Road, Sasolburg, 1947, South Africa

<sup>b</sup> Department of Chemistry, University of the Free State, P.O. Box 339, Bloemfontein, 9300, South Africa, E-mail: Fanie.Otto@sasol.com

#### Synopsis

A series of phosphine ligands with different electronic and steric properties were evaluated at fully modified conditions in cobalt catalysed hydroformylation of 1-octene. The Phoban and Lim ligand systems are superior both in terms of the highest reactivity and lowest alkene losses through hydrogenation. The observed catalytic behaviour provides evidence that is contrary to the dissociative substitution of CO by an alkene as the rate limiting step and indicate that the rate limiting step may have moved within the catalytic cycle and may now be situated at the carbonylation step where the chemoselectivity is also determined.

**Keywords:** Hydroformylation, Catalysis, Cobalt, Phosphine ligands, Crystallography

#### Experimental

All reactions were performed using the following conditions:  $[\text{Co}] = 13 \text{ mmol dm}^{-3}$ ,  $T = 453 \text{ K}$  (180°C),  $P = 60 \text{ bar}$ ,  $\text{H}_2:\text{CO} = 2:1$ , 1-octene = 75% m/m with the ligand and toluene as adjustable parameters to obtain the final reaction volume.

#### Data treatment

The pressure drop in this ballast vessel was converted to grams of syngas consumed, also correcting for deviations from ideal gas behaviour. The grams of syngas consumed as a function of time displayed well behaved first order behaviour and was subsequently fitted to the usual first order equation using a least squares minimization protocol with the rate constant and the initial- and final gram of syngas consumed as adjustable parameters.

---

\* Corresponding author. Fax +27-11-5223218; E-mail address: Fanie.Otto@sasol.com

## Effect of ligand:metal ratio

**Table S1:** Rate and product distribution as a function of ligand concentration.

| Ligand                           | [Ligand]/<br>mmol dm <sup>-3</sup> | $k_{\text{obs}}(\pm 0.01)/$<br>h <sup>-1</sup> | Conv./<br>% | Lin./<br>% | OH Yield/<br>% | Hydrog./<br>% | <sup>1</sup> J <sub>Se-p/</sub><br>Hz | Tolman/<br>°         |
|----------------------------------|------------------------------------|------------------------------------------------|-------------|------------|----------------|---------------|---------------------------------------|----------------------|
| VCH- <sup>t</sup> Bu             | 106                                | 0.25                                           | 92.1        | 88.2       | 79.5           | 12.8          |                                       | ~168 <sup>1</sup>    |
| "                                | 132                                | 0.25                                           | 92.5        | 88.6       | 80.2           | 12.9          | 672, 687                              |                      |
| PCy <sub>3</sub>                 | 79                                 | 0.14                                           | 91.7        | 83.5       | 68             | 21.9          |                                       | 175 <sup>2</sup>     |
| "                                | 132                                | 0.15                                           | 91.4        | 84.7       | 69.5           | 22.5          | 676                                   |                      |
| VCH-C <sub>5</sub>               | 53                                 | 0.16                                           | 89.9        | 86.8       | 80.2           | 14.2          |                                       | est 163 <sup>3</sup> |
| "                                | 132                                | 0.15                                           | 84.9        | 87.4       | 77.1           | 13.3          | 678                                   |                      |
| P <sup>n</sup> Bu <sub>3</sub>   | 132                                | 0.16                                           | 87.5        | 84.8       | 79.0           | 14.9          | 683                                   | 132 <sup>4</sup>     |
| Lim-C <sub>5</sub>               | 145                                | 0.41                                           | 97.8        | 83.2       | 86.8           | 9.0           | 684, 686                              | 163 <sup>5</sup>     |
| "                                | 158                                | 0.37                                           | 93.4        | 83.0       | 84.3           | 8.2           |                                       |                      |
| Phoban-C <sub>5</sub>            | 54                                 | 0.43                                           | 95.7        | 90.4       | 82.9           | 9.9           |                                       | 163 <sup>6</sup>     |
| "                                | 107                                | 0.38                                           | 95.5        | 90.8       | 83.4           | 10.0          | 686, 709                              |                      |
| PCyp <sub>3</sub>                | 158                                | 0.11                                           | 81.5        | 84.7       | 56.2           | 40.5          |                                       | 169 <sup>2</sup>     |
| "                                | 171                                | 0.10                                           | 81.2        | 84.8       | 56.1           | 40.2          | 687                                   |                      |
| Lim-Cyp                          | 132                                | 0.42                                           | 93.4        | 75.7       | 84.9           | 9.3           | 687, 690                              | 172 <sup>7</sup>     |
| "                                | 145                                | 0.40                                           | 94.9        | 77.4       | 82.8           | 11.1          |                                       |                      |
| P <sup>t</sup> Bu <sub>3</sub>   | 132                                | 0.26                                           | 97.8        | 73.2       | 82.8           | 11.9          | 688                                   | 164 <sup>8</sup>     |
| "                                | 145                                | 0.25                                           | 90.1        | 73.3       | 60             | 13.4          |                                       |                      |
| P( <i>p</i> -MeOPh) <sub>3</sub> | 106                                | 0.15                                           | 13.9        | 78.6       | 46.8           | 11.5          |                                       | 145 <sup>4</sup>     |
| "                                | 132                                | 0.13                                           | 13.8        | 77.8       | 41.4           | 12.4          | 708                                   |                      |
| PPH <sub>3</sub>                 | 105                                | 0.10                                           | 88.0        | 68.3       | 72.0           | 11.0          |                                       | 145 <sup>4</sup>     |
| "                                | 132                                | 0.08                                           | 90.3        | 69.8       | 79.0           | 12.4          | 732                                   |                      |
| PA-C <sub>5</sub>                | 158                                | 0.20                                           | 96.9        | 73.2       | 68.4           | 24.2          | 752                                   | 170 <sup>2</sup>     |
| "                                | 145                                | 0.2                                            | 86.8        | 72.2       | 65.6           | 23.2          |                                       |                      |

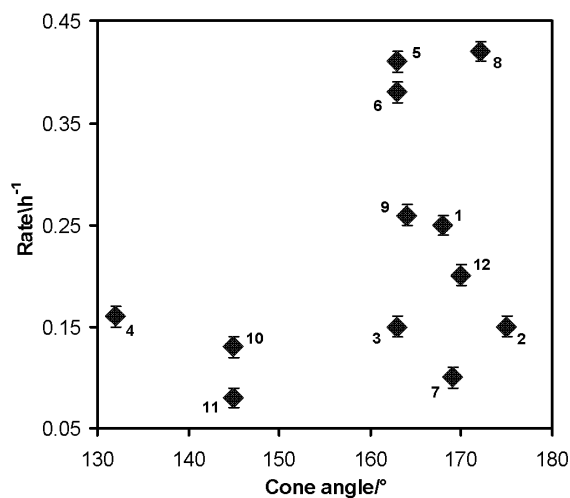

**Figure S1:** The effect of cone angle on the observed reaction rate during modified cobalt hydroformylation of 1-octene, the numbers refer to the entries in Table 5 in the manuscript.

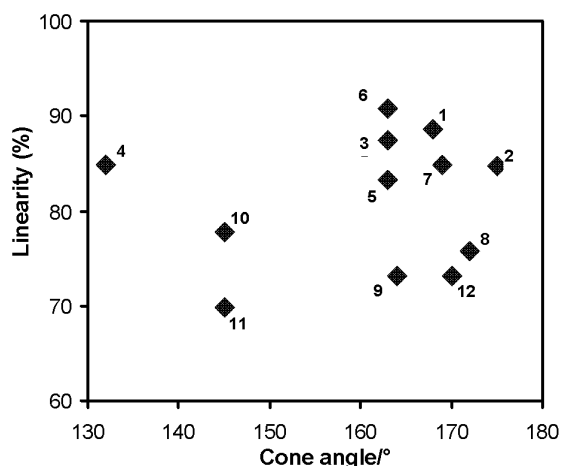

**Figure S2:** The effect of cone angle on the % product linearity for 1-octene hydroformylation using a fully modified cobalt catalyst system, the numbers refer to the entries in Table 5 in the manuscript.

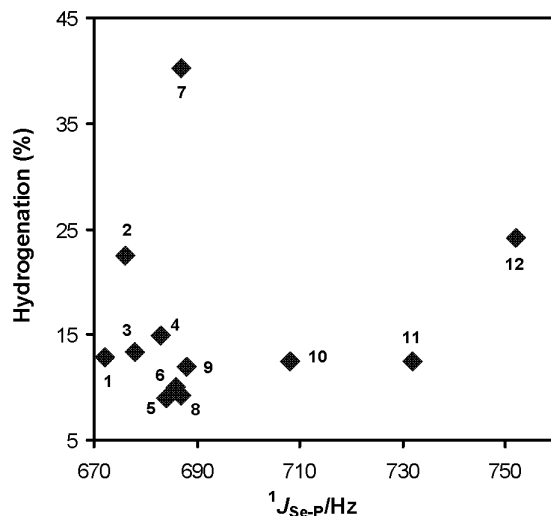

**Figure S3:** The effect of  $^1J_{Se-P}$  coupling constant on the % hydrogenation during modified cobalt hydroformylation of 1-octene, the numbers refer to the entries in Table 5 in the manuscript.

1 P. N. Bungu and S. Otto, *Acta Cryst.*, 2009, **E65**, o560.

2 This work.

3 Estimated by using the VCH component from VCH-<sup>i</sup>Bu and the C<sub>5</sub> component from Lim-C<sub>5</sub>.

4 C. A. Tolman, *Chem. Rev.* 1977, **77**, 313.

5 P. N. Bungu and S. Otto, determined from *trans*-[RhCl(CO)(Lim-C<sub>5</sub>)<sub>2</sub>], unpublished results.

6 P. N. Bungu and S. Otto, *Dalton Trans.*, 2007, 2876.

7 P. N. Bungu and S. Otto, determined from *trans*-[RhCl(CO)(Lim-Cyp)<sub>2</sub>], unpublished results.

8 P. Cheliatsidou, D. F. S. White, A. M. Z. Slavin and D. J. Cole-Hamilton, *Dalton Trans.*, 2008, 2389.
